# Supplementary material for: Inositol pyrophosphates activate the vacuolar transport chaperone complex in yeast by disrupting a homotypic SPX domain interaction
Source: PubMed Central journal article supplement (PMC10167327; doi:10.1038/s41467-023-38315-w), 2023-05-08
Supplement: 41467_2023_38315_MOESM1_ESM.pdf [file 41467_2023_38315_MOESM1_ESM.pdf]

## Supplementary Figures

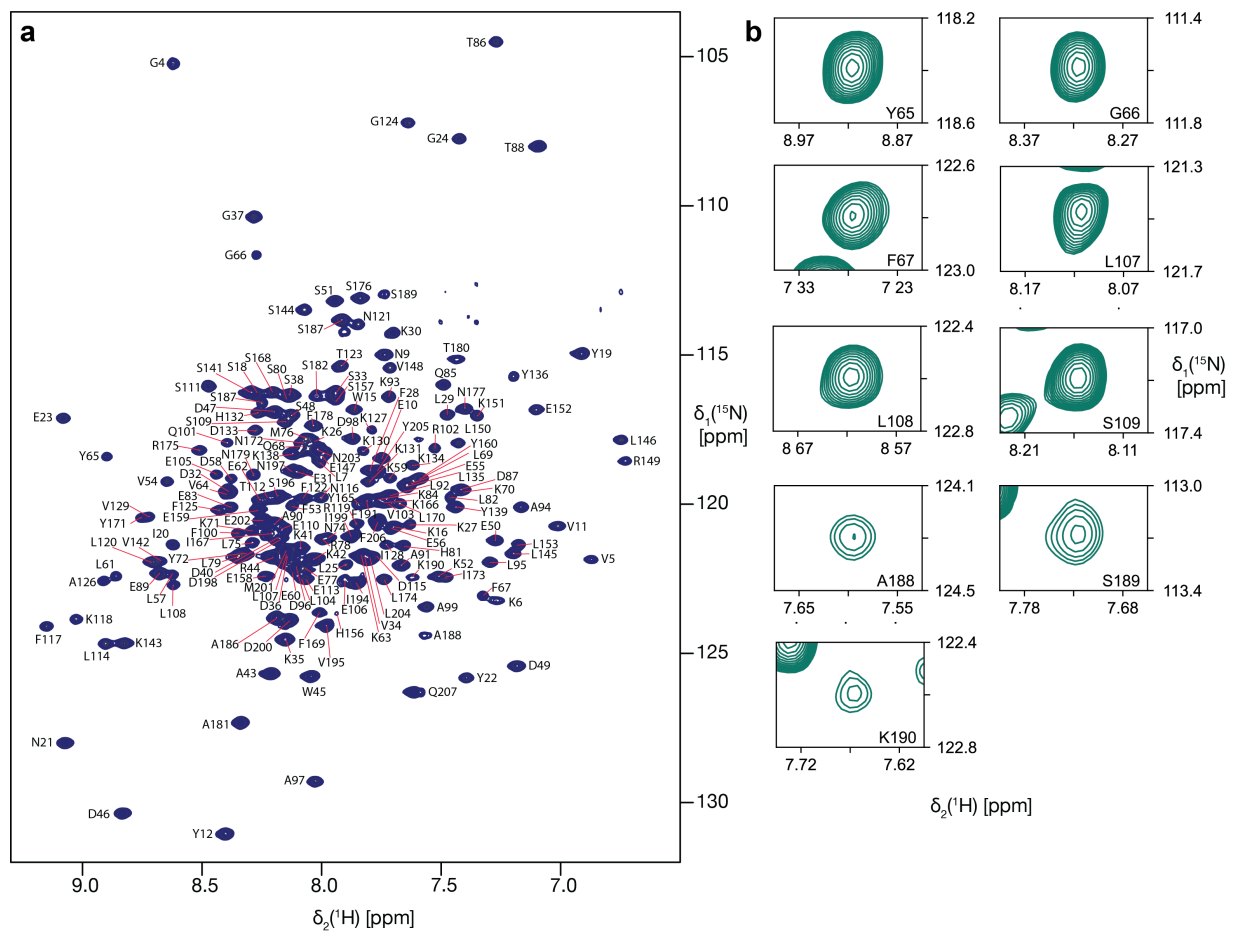

**Supplementary Figure 1. NMR spectroscopy and assignments of SPX2.** (a) 2D [ $^{15}\text{N}$ , $^1\text{H}$ ]-TROSY experiment of [ $U$ - $^2\text{H}$ , $^{15}\text{N}$ ]-SPX2 in NMR buffer. Sequence-specific resonance assignments are indicated. (b) Zoom-in on the three resonance triplets from helices  $\alpha$ 3 (Y65–F67),  $\alpha$ 4 (L107–S109) and  $\alpha$ 7 (A188–K190), plotted at the same contour levels. The resonances of helix  $\alpha$ 7 have significantly reduced signal intensity compared to the others, indicating increased water exchange along with increased local dynamics.

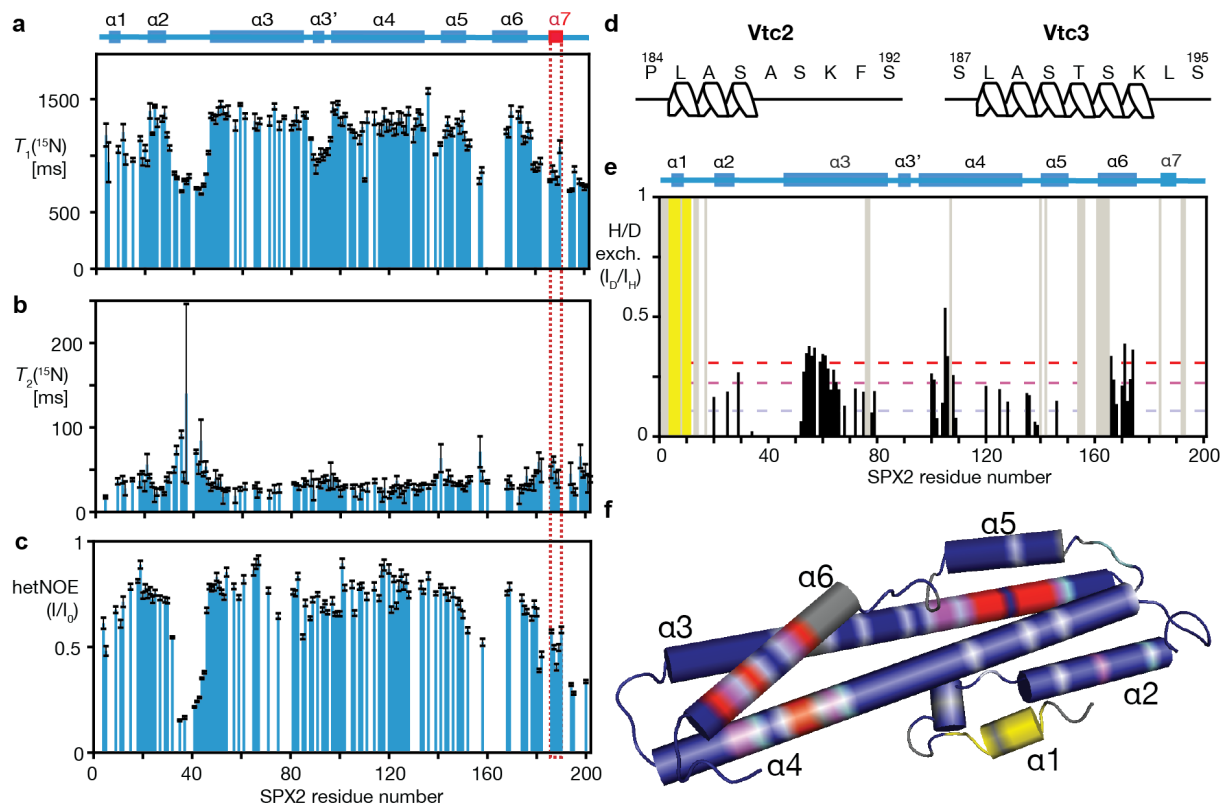

**Supplementary Figure 2. Characterization of SPX2 backbone dynamics by NMR spectroscopy.** (a, b, c) NMR spin relaxation parameters  $T_1(^{15}\text{N})$ ,  $T_2(^{15}\text{N})$  and hetNOE of SPX2 in NMR buffer, measured at 600 MHz field strength. Red dashed lines indicate the position of helix  $\alpha_7$ . Data were fitted from  $n = 8$  relaxation time points. Error bars indicate fit error estimated by covariance method. (d) Secondary structure elements in Alphafold predictions for Vtc2 and Vtc3. Curl – helix; line – random coil. (e) Residue-specific H/D exchange of SPX2.  $I_D$  – intensities of resonances measured in  $\text{D}_2\text{O}$ -based MST buffer,  $I_H$  – intensities of resonances measured in  $\text{H}_2\text{O}$ -based MST buffer. Dashed horizontal lines (red/purple/light blue), indicate three threshold levels based on standard deviation for the classification of residues into high/medium/low exchange protection. (f) Protection against amide exchange plotted on a structural model of SPX2, as determined in D. Red/purple/light blue – high/medium/low protection; dark blue – no protection; yellow – residues experiencing intermediate chemical exchange; gray – residues not assigned. Source data are provided as a Source Data file.

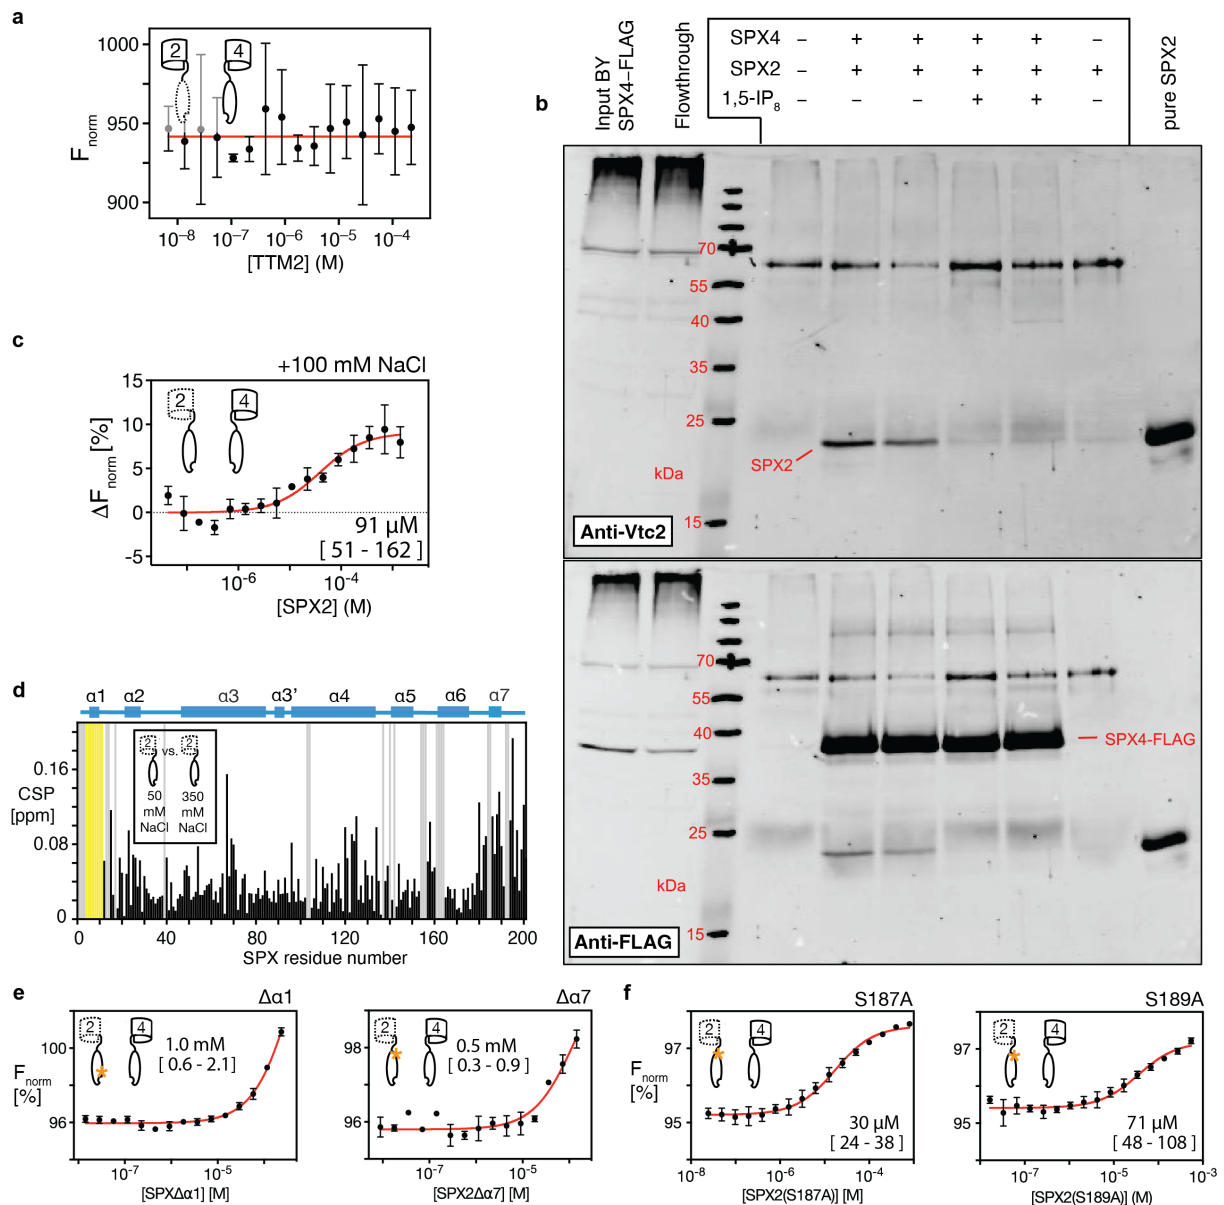

**Supplementary Figure 3. Characterization of the binding between TTM2, SPX2 and Vtc4 constructs.** (a) MST binding experiment of TTM2 to Vtc4\*. No binding is detected, as indicated by the flat fitting curve (red).  $n=3$  replicates. (b) Co-immunoadsorption of the SPX4 and SPX2 domains. The FLAG-tagged SPX4 domain was expressed as a soluble protein in yeast strain BY4741  $\Delta$ pep4  $\Delta$ prb1. A whole-cell extract expressing SPX4-FLAG or an empty plasmid was incubated with anti-FLAG-antibodies covalently linked to magnetic beads. The beads were washed, incubated with purified recombinant SPX2 in the presence or absence of 10  $\mu$ M 1,5-IP<sub>8</sub>, as indicated, washed again and analyzed by Western blotting, using antibodies to SPX2 (top blot) and FLAG (bottom blot). The experiment was performed  $n=3$  times with similar results. (c) MST binding affinities of SPX2 to Vtc4\* at elevated NaCl conditions.  $n=3$  replicates. (d) Chemical shift perturbation plot of SPX2 induced by sodium chloride titration. Yellow -

residues experiencing intermediate chemical exchange, gray – residues not assigned. **(e)** Binding affinities of SPX2 $\Delta\alpha$ 1 or SPX2 $\Delta\alpha$ 7, respectively, to Vtc4\* measured by MST. Orange asterisks display the protein lacking areas in the cartoon scheme.  $n=2$  replicates. **(f)** MST binding affinities of SPX2 with single mutations to Vtc4\* in the MST buffer. Asterisks show the mutated positions in the cartoon scheme. Graphs show the means and SEM;  $n=3$  replicates. The dissociation constants determined by the fits are displayed along with a 95% confidence interval. Source data are provided as a Source Data file.

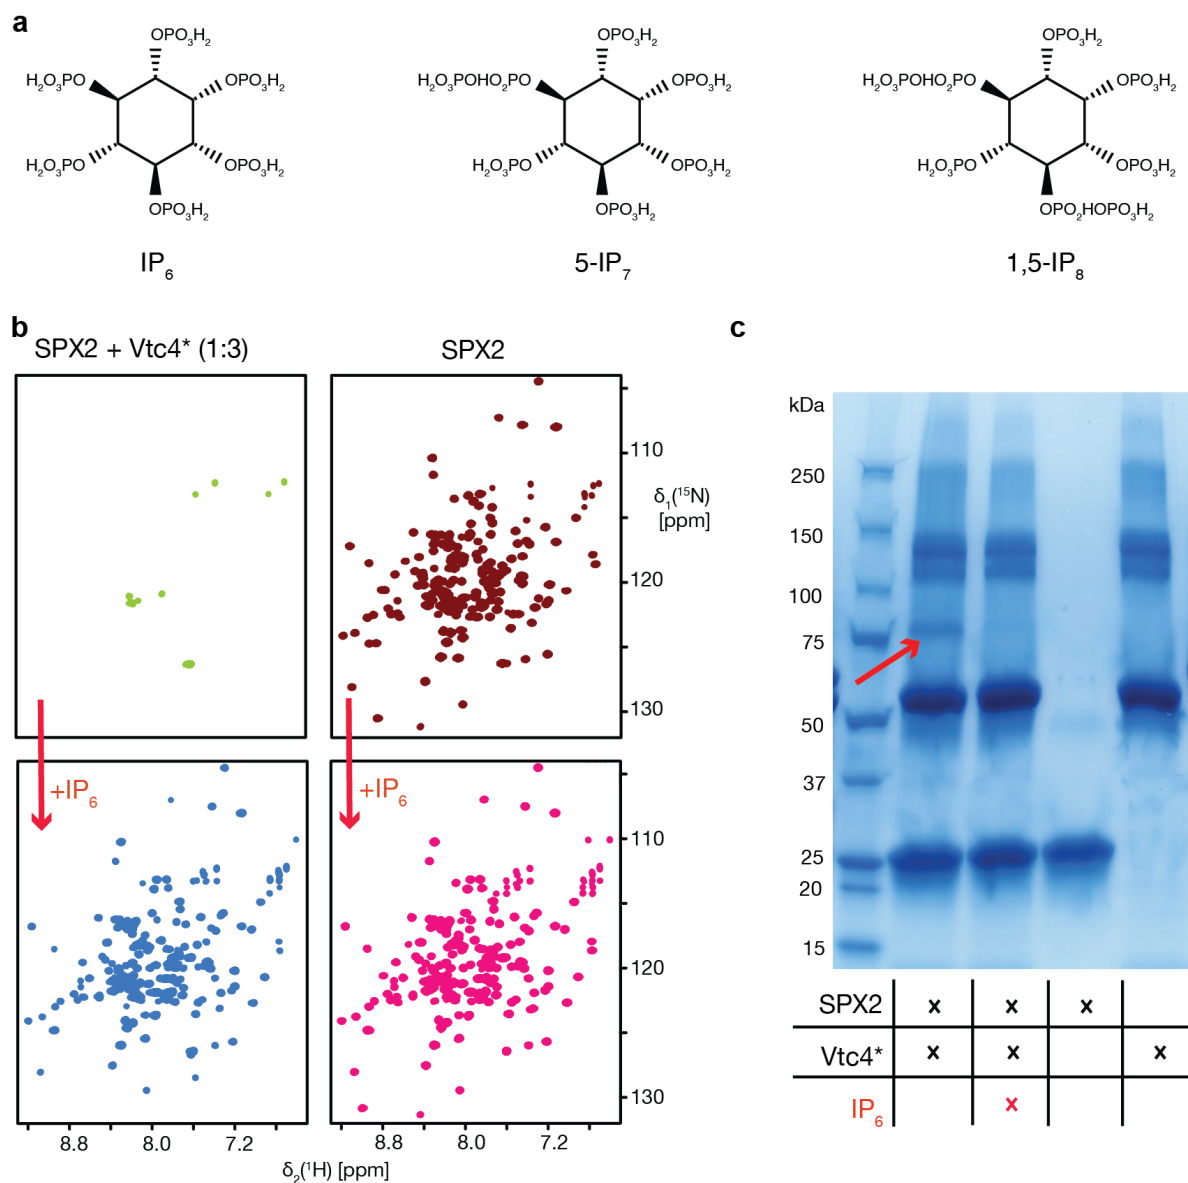

**Supplementary Figure 4. IP<sub>6</sub> disrupts the interaction between SPX2 and Vtc4\*.** (a) Chemical structures of inositol phosphate (IP<sub>6</sub>), 5-diphospho-inositol tetrakisphosphate (5-IP<sub>7</sub>), 1,5-bis-diphospho-inositol tetrakisphosphate (1,5-IP<sub>8</sub>). (b) NMR spectra of [*U*-<sup>15</sup>N]-SPX2 and unlabeled Vtc4\* recorded in a molar ratio 1:3 in the absence and presence of a 40x molar excess of IP<sub>6</sub>. (c) Cross-linking experiment of SPX2 binding to Vtc4\* with the cross-linker CDI in absence (1<sup>st</sup> lane) or presence of 20x molar excess of IP<sub>6</sub> (2<sup>nd</sup> lane). Negative controls (3<sup>rd</sup> and 4<sup>th</sup> lane) are single components cross-linked in the absence of a IP<sub>6</sub>. The buffer used was 25 mM HEPES pH 7.0, 150 mM NaCl, 0.5 mM EDTA, 0.5 mM TCEP. The red arrow indicates a band with the expected size of a cross-linked SPX2–Vtc4\* complex. The experiment was conducted once.

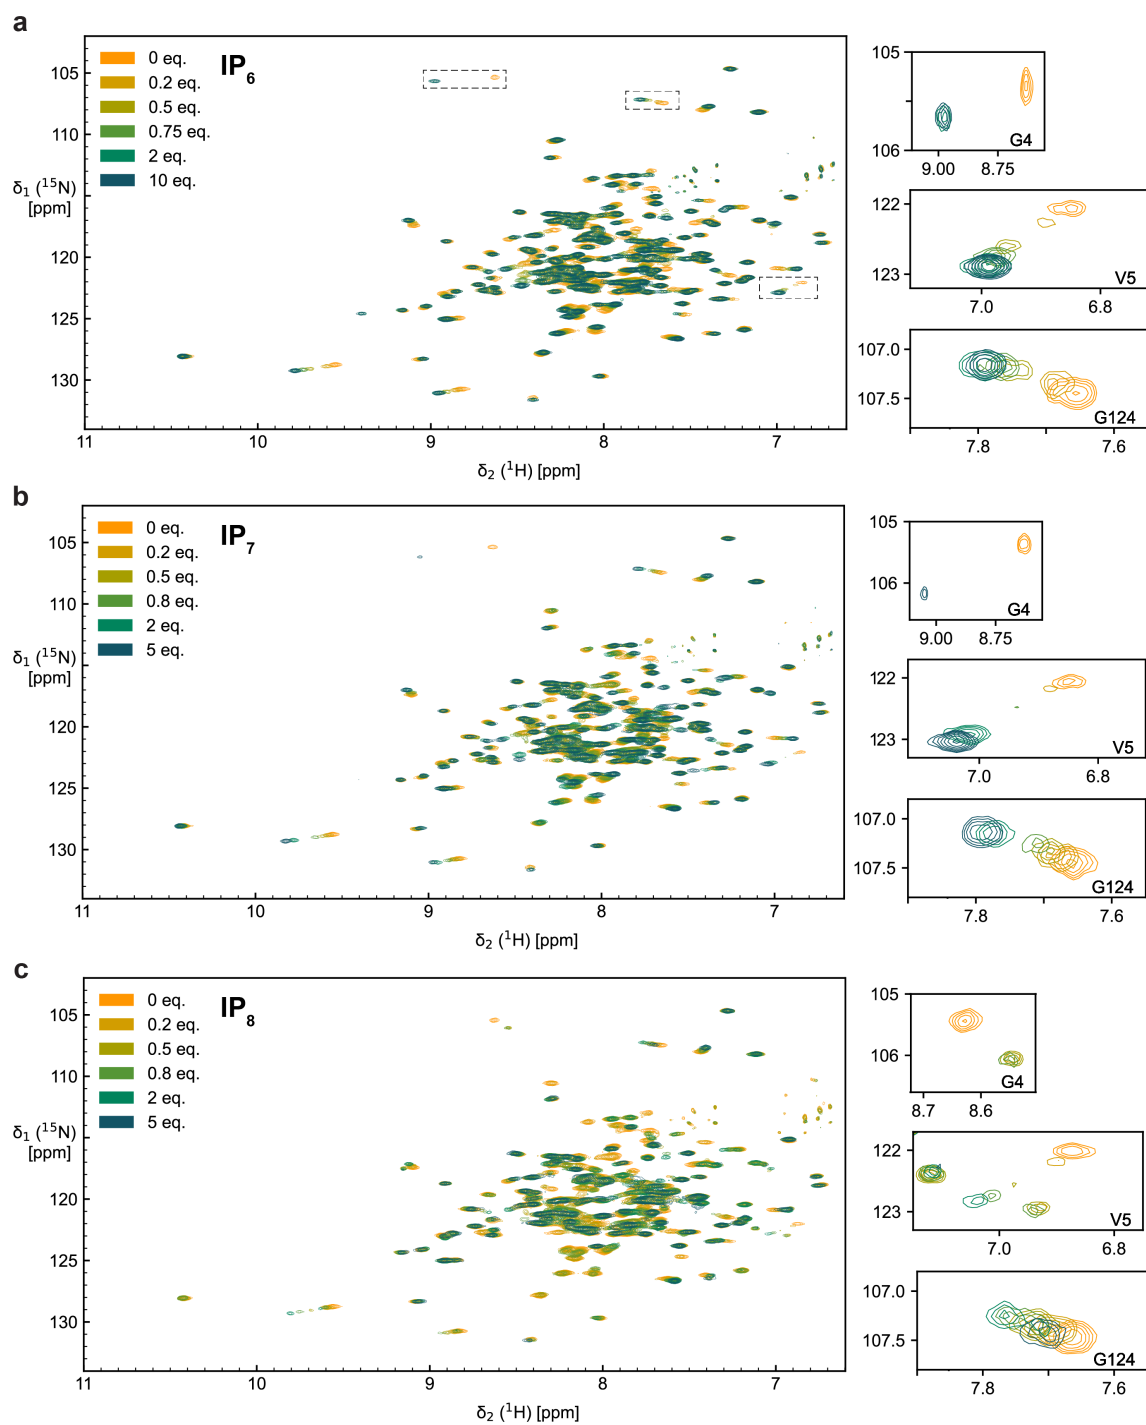

**Supplementary Figure 5. NMR titration series of SPX2 with IP<sub>x</sub>.** Superimposed 2D [<sup>15</sup>N,<sup>1</sup>H]-TROSY spectra with different concentrations of IP<sub>x</sub>, as indicated and zooms of three selected residues undergoing intermediate exchange. NMR titration was performed using (a) inositol phosphate (IP<sub>6</sub>), (b) 5-diphospho-inositol tetrakisphosphate (5-IP<sub>7</sub>), (c) 1,5-bis-diphospho-inositol tetrakisphosphate (1,5-IP<sub>8</sub>) and [<sup>15</sup>N]-SPX2 in NMR Buffer with 250mM NaCl.

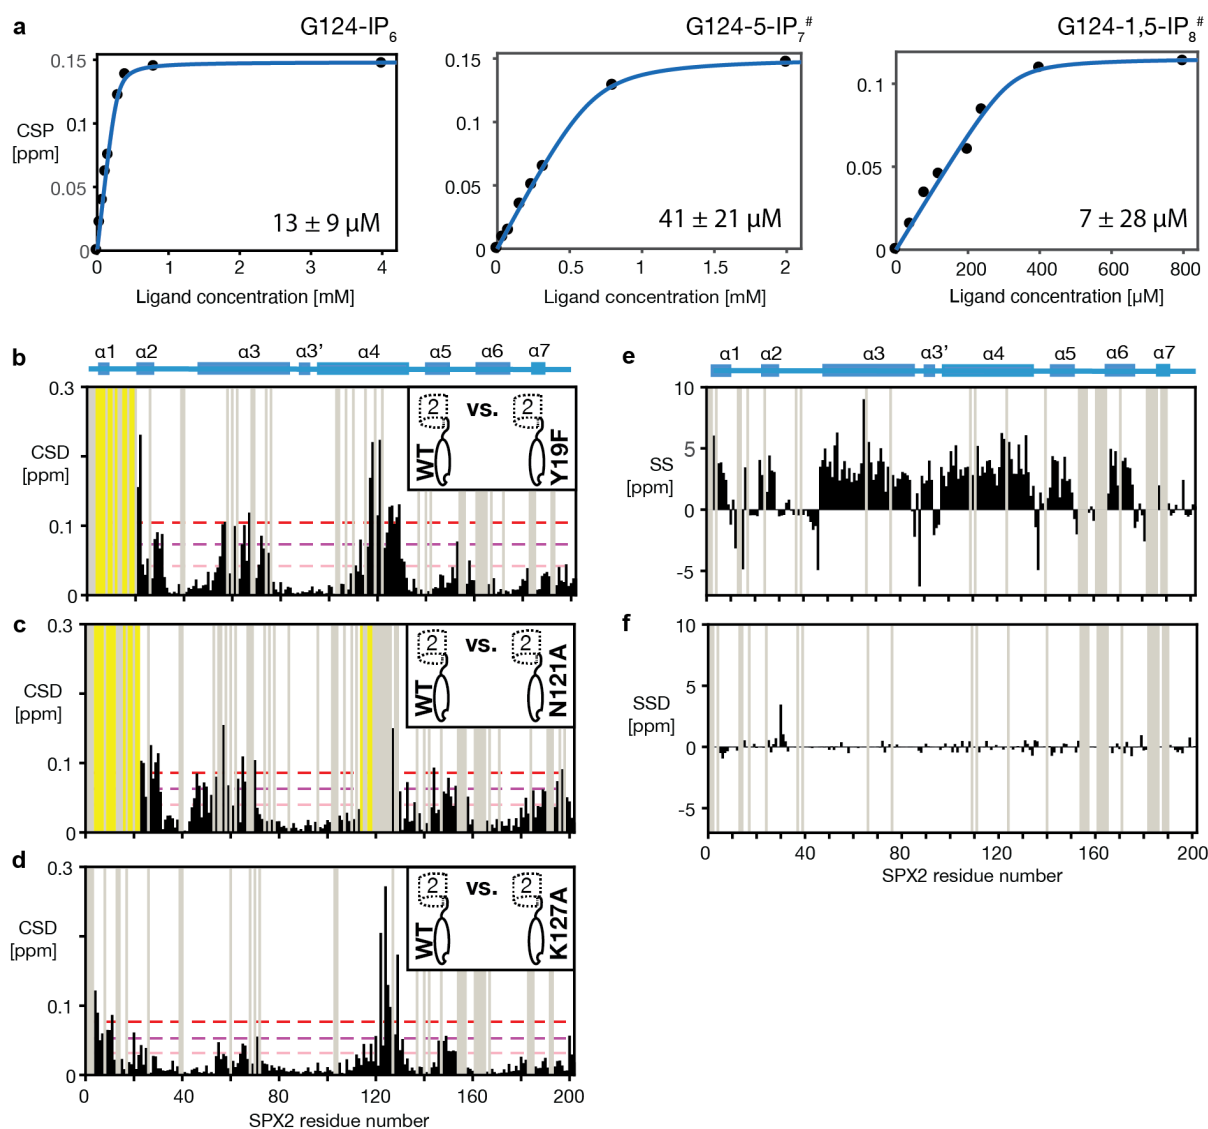

**Supplementary Figure 6. Structural characterization of holo-state and pseudo-active mutants of SPX2.** (a) Determination of dissociation constants of SPX2 bound to different non-hydrolysable IP<sub>x</sub> by NMR on the example of glycine 124. Graphs show the means and SEM;  $n=3$ . (b, c, d) Chemical shift differences between the wild-type SPX2 and single-point mutations of SPX2 (Y19F, N121A, K127A). Yellow - residues experiencing intermediate chemical exchange, gray – residues not assigned. Dashed horizontal lines (red/purple/magenta), indicate three threshold levels based on standard deviation for the classification of residues into high/medium/low perturbation. (e, f) Secondary elements determination by secondary chemical shift (SS) plots of SPX2 in the presence of 10-fold molar excess of IP<sub>6</sub> and SS plot displaying differences between SS value in apo- and holo-state. Source data are provided as a Source Data file.

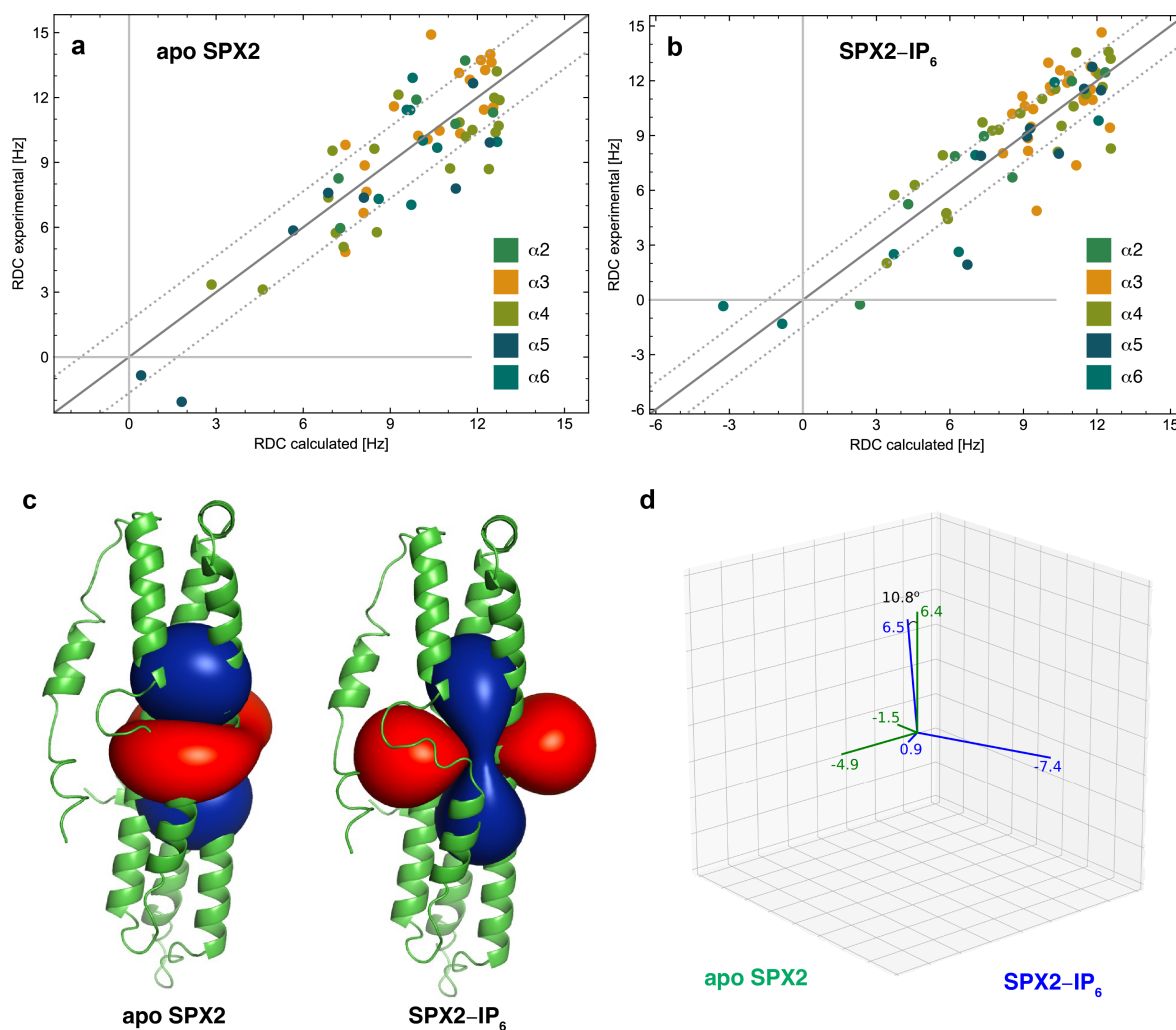

**Supplementary Figure 7. Alignment of SPX2 in bacteriophage solution measured by residual dipolar couplings (RDCs).** (a) Experimental versus calculated residual dipolar couplings of apo SPX2 in bacteriophage solution. Data points are colored per helix, as indicated. (b) Same for SPX2 with bound IP<sub>6</sub>. (c) Display of the alignment tensors from the fits in A and B, on the structural model of SPX2, representing the value of a virtual N-H bond vector pointing in a particular direction of space. The red/blue isosurfaces represent the preferred/non-preferred orientation of the magnetic field with respect to the fixed protein frame. (d) Visualization of the alignment tensors in the coordinate system of the apo-SPX2 tensor. The axes are defined by three eigenvectors scaled by the corresponding eigenvalues in units of  $10^{-32} \text{ m}^3$ . The orientation of the tensor along the Z-axis is only slightly changed. Source data are provided as a Source Data file.



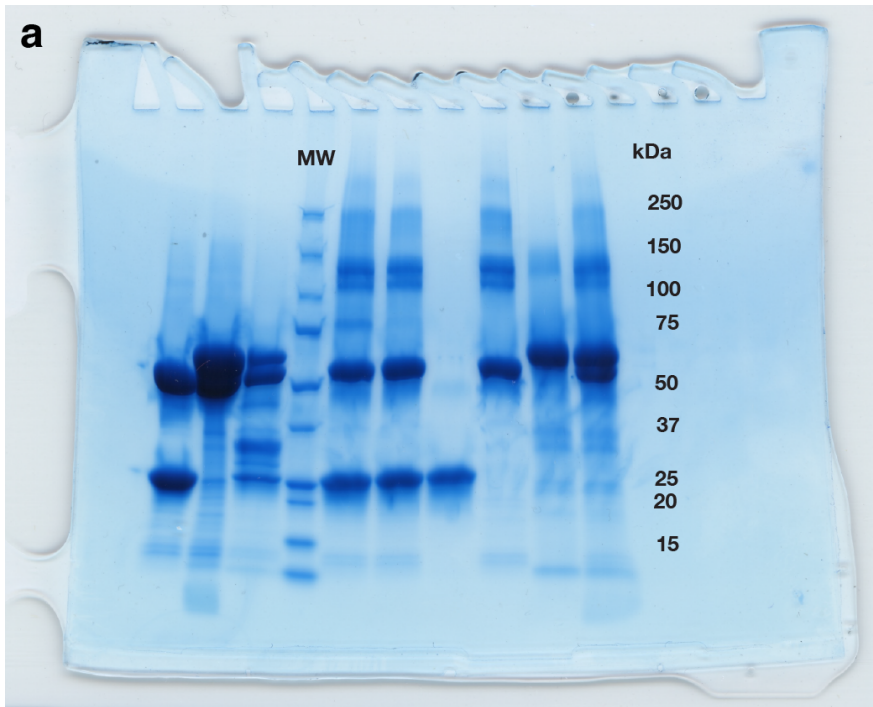

**Supplementary Figure 8. (a)** Uncropped gel of Supplementary Figure 4c.

## Supplementary Tables

**Supplementary Table 1. Phosphorylation and mutation sites of SPX domains localized between helix  $\alpha$ 6 and the adjacent domain.**

| Protein                                  | Organism             |                              |
|------------------------------------------|----------------------|------------------------------|
| <b>Phosphorylation sites<sup>a</sup></b> |                      |                              |
| Vtc2                                     | <i>S. cerevisiae</i> | S182, S187, S192, S193, S196 |
| Vtc3                                     | <i>S. cerevisiae</i> | S187, S190, S192, S195, S198 |
| Gde1                                     | <i>S. cerevisiae</i> | S254, T255, S256             |
| Pho81                                    | <i>S. cerevisiae</i> | T215                         |
| Pho91                                    | <i>S. cerevisiae</i> | S295, S311, S312, T297       |
| Syg1                                     | <i>S. cerevisiae</i> | S342                         |
| SPX2                                     | <i>A. thaliana</i>   | S195                         |
| PHO1;H3                                  | <i>A. thaliana</i>   | S188                         |
| <b>Mutation site<sup>b</sup></b>         |                      |                              |
| Xpr1                                     | Human                | L218S                        |

<sup>a</sup> Reported in yeast database *thebiogrid.org* 4.2 and Arabidopsis database *PhosPhAt 4.0*<sup>1-3</sup>.

<sup>b</sup> Reported in <sup>4</sup>.

**Supplementary Table 2. UniRef100 sequences, in which the helix  $\alpha$ 7 motif was identified.**

| Domain adjacent to SPX | UniProt identifier | Annotation                    | Species                             |
|------------------------|--------------------|-------------------------------|-------------------------------------|
| TTM                    | A0A1G4IN84         | ---                           | <i>Lachancea sp.</i>                |
|                        | A0A376B1S5         | VTC3-like                     | <i>Saccharomyces ludwigii</i>       |
|                        | C8Z7T1             | Vtc2p                         | <i>Saccharomyces cerevisiae</i>     |
|                        | A0A1G4IPK6         | ---                           | <i>Lachancea dasiensis</i>          |
|                        | J8Q8H7             | Vtc2p                         | <i>Saccharomyces arboricola</i>     |
|                        | A0A4T0X0U9         | ---                           | <i>Candida inconspicua</i>          |
|                        | A0A0N7MMG7         | ---                           | <i>Lachancea quebecensis</i>        |
|                        | A0A1X7QYL6         | VTC2-like                     | <i>Kazachstania saulgeensis</i>     |
|                        | A0A1L0CVH1         | VTC3-like                     | <i>Hanseniaspora guilliermondii</i> |
|                        | G8JWC8             | ---                           | <i>Eremothecium cymbalariae</i>     |
|                        | G0WEA1             | ---                           | <i>Saccharomyces dairenensis</i>    |
|                        | J6EEI2             | VTC3-like                     | <i>Saccharomyces kudriavzevii</i>   |
|                        | A0A367Y0Z6         | VTC2-like                     | <i>Candida viswanathii</i>          |
|                        | Q750H3             | ---                           | <i>Eremothecium gossypii</i>        |
|                        | A0A367YD17         | VTC2-like                     | <i>Candida viswanathii</i>          |
|                        | A0A1G4IWE9         | ---                           | <i>Lachancea nothofagi</i>          |
|                        | N1P1U8             | Vtc3p                         | <i>Saccharomyces cerevisiae</i>     |
|                        | A0A1Q3AGE2         | ---                           | <i>Candida mogii</i>                |
|                        | A0A1G4IN66         | ---                           | <i>Lachancea meyersii</i>           |
|                        | A0A6C1E774         | Pi metabolism transcription   | <i>Saccharomyces pastorianus</i>    |
|                        | A0A6C1EG68         | VTC2 / 3                      | <i>Saccharomyces pastorianus</i>    |
|                        | C5DXC4             | ---                           | <i>Candida mogii</i>                |
|                        | A0A1G4M808         | ---                           | <i>Lachancea fermentati</i>         |
|                        | A0A1Q3A2L8         | ---                           | <i>Candida mogii</i>                |
|                        | J7R8F3             | ---                           | <i>Saccharomyces naganishii</i>     |
|                        | A0A1S7HQC7         | VTC2 / 3                      | <i>Zygosaccharomyces parabailii</i> |
|                        | G8ZR46             | ---                           | <i>Candida colliculosa</i>          |
|                        | A0A1S7I1A1         | VTC2 / 3                      | <i>Zygosaccharomyces parabailii</i> |
|                        | A0A1E3NSJ7         | ---                           | <i>Pichia membranifaciens</i>       |
|                        | A0A6C1E346         | VTC2 / 3                      | <i>Saccharomyces pastorianus</i>    |
|                        | J8THM2             | VTC2-like                     | <i>Saccharomyces kudriavzevii</i>   |
|                        | A0A1B7TB83         | ---                           | <i>Hanseniaspora valbyensis</i>     |
|                        | A0A0C7N0A4         | ---                           | <i>Lachancea lanzarotensis</i>      |
|                        | Q02725             | VTC3-like                     | <i>Saccharomyces cerevisiae</i>     |
|                        | P43585             | VTC2-like                     | <i>Saccharomyces cerevisiae</i>     |
|                        | A0A0L8RA68         | VTC3-like                     | <i>Saccharomyces eubayanus</i>      |
|                        | A0A0L8RJY6         | VTC2-like                     | <i>Saccharomyces eubayanus</i>      |
|                        | A0A1E5R649         | VTC2-like                     | <i>Hanseniaspora opuntiae</i>       |
|                        | I2H317             | ---                           | <i>Tetrapisispora blattae</i>       |
|                        | R9XJU5             | ---                           | <i>Ashbya aceri</i>                 |
|                        | B5VTE3             | ---                           | <i>Saccharomyces cerevisiae</i>     |
| A0A1Q2YBK4             | ---                | <i>Pichia membranifaciens</i> |                                     |
| A0A1B7SCC9             | ---                | <i>Ogataea polymorpha</i>     |                                     |

|     |            |                                                 |                                     |
|-----|------------|-------------------------------------------------|-------------------------------------|
|     | AOA0W0D5B2 | VTC2-like                                       | <i>Candida glabrata</i>             |
|     | C5DBH3     | ---                                             | <i>Lachancea thermotolerans</i>     |
|     | AOA4C2E511 | P <sub>i</sub> metabolism transcription         | <i>Zygosaccharomyces mellis</i>     |
|     | AOA0A8LCC9 | ---                                             | <i>Kluyveromyces dobzhanskii</i>    |
|     | Q6CNJ4     | ---                                             | <i>Kluyveromyces lactis</i>         |
|     | AOA1E5RES9 | VTC2-like                                       | <i>Hanseniaspora osmophila</i>      |
|     | W0T7N7     | VTC2-like                                       | <i>Kluyveromyces marxianus</i>      |
|     | C8ZJ09     | Vtc3p                                           | <i>Saccharomyces cerevisiae</i>     |
|     | Q6FUM8     | ---                                             | <i>Candida glabrata</i>             |
|     | AOA1E5RD13 | VTC2-like                                       | <i>Hanseniaspora uvarum</i>         |
|     | AOA1G4K314 | ---                                             | <i>Lachancea mirantina</i>          |
|     | A7TJR7     | ---                                             | <i>Vanderwaltozyma polyspora</i>    |
|     | AOA0L8VRX1 | VTC2p                                           | <i>Saccharomyces boulardii</i>      |
|     | AOA0L8VFX1 | VTC3p                                           | <i>Saccharomyces boulardii</i>      |
|     | H2ASH6     | ---                                             | <i>Kazachstania africana</i>        |
|     | B5VI22     | ---                                             | <i>Saccharomyces cerevisiae</i>     |
|     | GOVD31     | ---                                             | <i>Naumovozyma castellii</i>        |
| ANK | AOA1E4RMD6 | ---                                             | <i>Hyphopichia burtonii</i>         |
|     | AOA1L0FMB3 | Glycerophosphocholine phosphodiesterase         | <i>Hanseniaspora guilliermondii</i> |
|     | AOA178FA43 | Glycerophosphocholine phosphodiesterase         | <i>Trichophyton rubrum</i>          |
|     | AOA022WCM4 | ---                                             | <i>Trichophyton rubrum</i>          |
|     | D4DGV3     | Glycerophosphocholine phosphodiesterase         | <i>Trichophyton verrucosum</i>      |
|     | AOA1B7TH22 | Glycerophosphocholine phosphodiesterase         | <i>Hanseniaspora valbyensis</i>     |
|     | AOA1E5RTU3 | Glycerophosphocholine phosphodiesterase         | <i>Hanseniaspora opuntiae</i>       |
|     | AOA178FIU7 | Glycerophosphocholine phosphodiesterase         | <i>Trichophyton violaceum</i>       |
|     | AOA022Y3L0 | ---                                             | <i>Trichophyton soudanense</i>      |
|     | D4B066     | Glycerophosphocholine phosphodiesterase         | <i>Arthroderma benhamiae</i>        |
|     | AOA1E5RJK4 | Glycerophosphocholine phosphodiesterase         | <i>Hanseniaspora uvarum</i>         |
|     | AOA2J6SUV1 | Glycerophosphocholine phosphodiesterase         | <i>Hyaloscypha bicolor</i>          |
|     | W7I643     | Glycerophosphocholine phosphodiesterase         | <i>Drechslerella stenobrocha</i>    |
|     | E4V1Y0     | Glycerophosphocholine phosphodiesterase         | <i>Arthroderma gypseum</i>          |
|     | G9P286     | Glycerophosphocholine phosphodiesterase         | <i>Hypocrea atroviridis</i>         |
| ZnF | AOA6G1HV83 | ---                                             | <i>Trichodelitschia bisporula</i>   |
|     | AOA5C3LW70 | ---                                             | <i>Crucibulum laeve</i>             |
| EXS | A8BME6     | EXS family protein                              | <i>Giardia intestinalis</i>         |
|     | E1F2R9     | EXS family protein                              | <i>Giardia intestinalis</i>         |
|     | AOA103XSP9 | EXS family protein                              | <i>Cynara cardunculus</i>           |
|     | V6TBZ6     | EXS family protein                              | <i>Giardia intestinalis</i>         |
|     | AOA3B3BYR1 | Xenotropic and polytropic retrovirus receptor 1 | <i>Oryzias melastigma</i>           |

**Supplementary Table 3. Thermal stability of SPX2 in presence of ligands.**

| <b>Ligand</b>       | <b>T<sub>m</sub> [°C]<sup>a</sup></b> |
|---------------------|---------------------------------------|
| No ligand           | 34.4 ± 0.1                            |
| IP <sub>6</sub>     | 47.2 ± 0.2                            |
| 5-IP <sub>7</sub>   | 43.8 ± 0.0                            |
| 1,5-IP <sub>8</sub> | 38.2 ± 0.1                            |

<sup>a</sup> Melting temperature determined by nanoDSF (Prometheus).

## Supplementary References

1. Heazlewood, J. L. *et al.* PhosPhAt: a database of phosphorylation sites in *Arabidopsis thaliana* and a plant-specific phosphorylation site predictor. *Nucleic Acids Res.* **36**, D1015–1021 (2008).
2. Durek, P. *et al.* PhosPhAt: the *Arabidopsis thaliana* phosphorylation site database. An update. *Nucleic Acids Res.* **38**, D828–D834 (2010).
3. Zulawski, M., Braginets, R. & Schulze, W. X. PhosPhAt goes kinases—searchable protein kinase target information in the plant phosphorylation site database PhosPhAt. *Nucleic Acids Res.* **41**, D1176–D1184 (2013).
4. Legati, A. *et al.* Mutations in XPR1 cause primary familial brain calcification associated with altered phosphate export. *Nat Genet.* **47**, 579–581 (2015).
